# Supplementary material for: Boosting Clear Cell Renal Carcinoma-Specific Drug Discovery Using a Deep Learning Algorithm and Single-Cell Analysis
Source: MDPI journal article supplement (doi:10.3390/ijms25074134), 2024-04-08
Supplement: s1 [file s1]

**Table S1.** The parallel table of T cell clustering in UMAP and cell types identified by marker genes.

| Cell Types Clustered in UMAP | Cell Types Annotated | Marker Genes                       |
|------------------------------|----------------------|------------------------------------|
| cc-CD8+ T1                   | Unknown              | None                               |
| cc-CD8+ T2                   | CD8 Trm              | GZMA,GZMB,GZMK,HLA-C,IFNGAMMA,PRF1 |
| cc-CD8+ T3                   | Tnaive               | CXCL13                             |
| cc-CD4+ T4                   | Tregs                | FOXP3,IL2RA,TIGIT,TNFRSF18,TNFRSF4 |

Supplementary Figures:

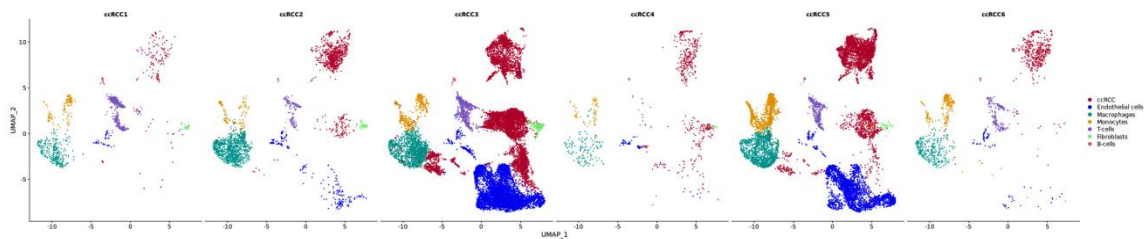

**Figure S1.** The distribution of different types of cells in six tumor samples.

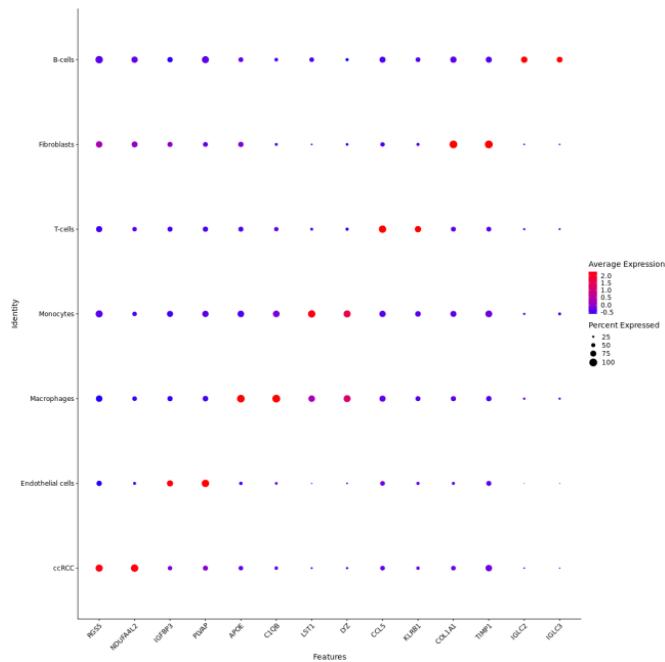

**Figure S2.** The expression levels of marker genes in different cell types.

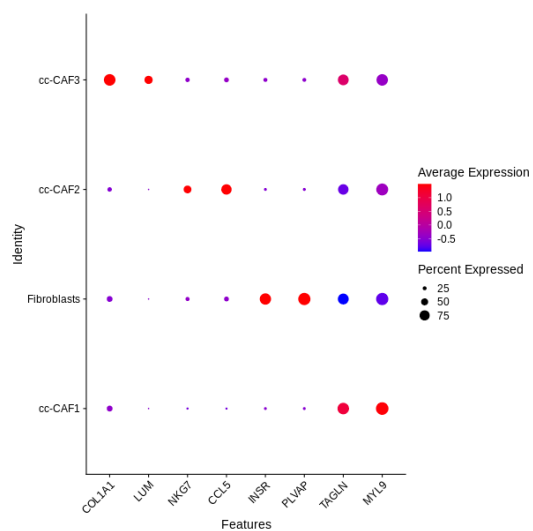

**Figure S3.** Differently expressed genes in different subtypes of CAF cells.

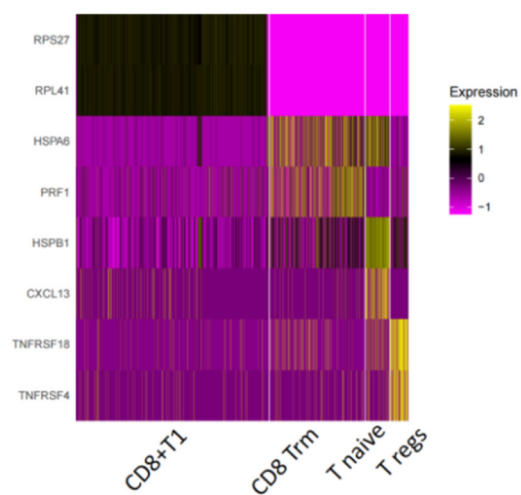

**Figure S4.** Gene expression characteristics of four types of T cells.

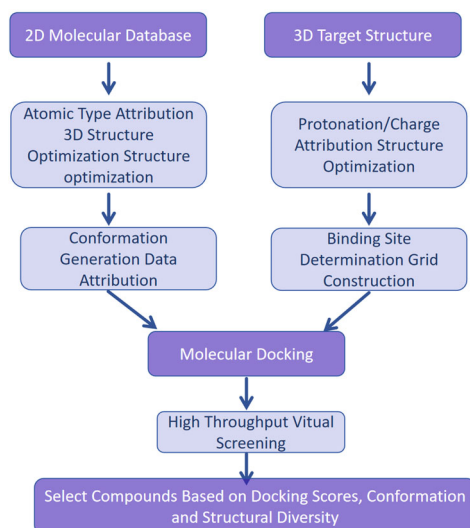

**Figure S5.** Workflow of the candidate drugs targeting EPAS1, selected via virtual screening.
