# Supplementary material for: Boosting Clear Cell Renal Carcinoma-Specific Drug Discovery Using a Deep Learning Algorithm and Single-Cell Analysis
Source: Int J Mol Sci. 2024 Apr 8;25(7):4134. doi: 10.3390/ijms25074134 (PMC11012314; doi:10.3390/ijms25074134)
Supplement: Supplementary file 1 [file ijms-25-04134-s001.zip › Supplementary data.xlsx]

## Sheet: Library
Inhibitors, Agonists, Screening Libraries www.MedChemExpress.com

## Sheet: Compound Information
Part	Plate	Well
